# Supplementary material for: Amphiphilic Polymer Conetwork Gel Films Based on Tetra-Poly(ethylene Glycol) and Tetra-Poly(ε-Caprolactone)
Source: Polymers (Basel). 2022 Jun 23;14(13):2555. doi: 10.3390/polym14132555 (PMC9269314; doi:10.3390/polym14132555)
Supplement: Supplementary file 1 [file polymers-14-02555-s001.zip]

Archive with 4 entries (4 files):
- Figure S1.jpg
- Figure S2.jpg
- Supplementary Material.pdf
- Video S1.mp4
